# Supplementary material
Source: PubMed Central journal article supplement (PMC5695895)
Supplement: cm7b03555_si_001.pdf [file cm7b03555_si_001.pdf]

## Supporting Information

# Theoretical Study of Ripening Mechanisms of Pd Clusters on Ceria

Ya-Qiong Su, Jin-Xun Liu, Ivo A.W. Filot, and Emiel J.M. Hensen\*

Laboratory of Inorganic Materials Chemistry, Schuit Institute of Catalysis, Eindhoven University of Technology, P.O. Box 513, 5600 MB Eindhoven, The Netherlands.

### 1. Gas-phase Pd<sub>n</sub> clusters

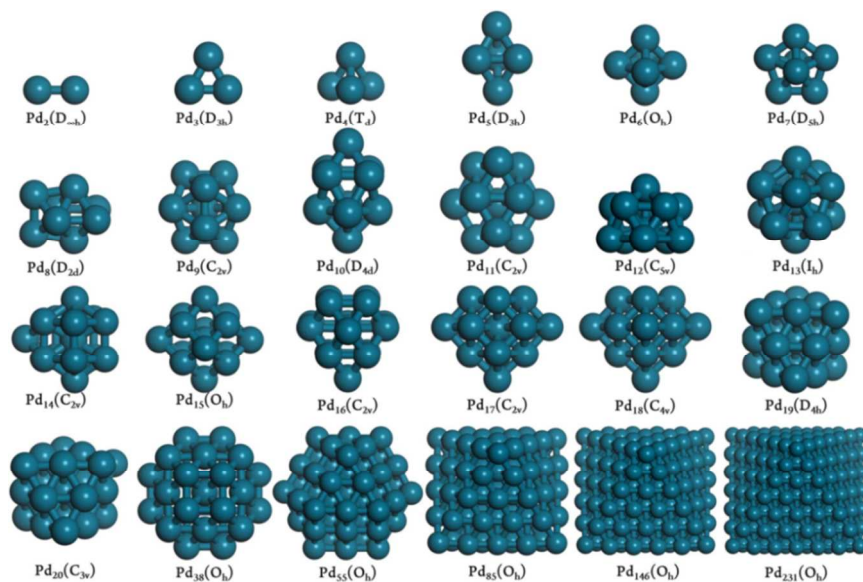

Figure S1a. Lowest-energy structures of Pd<sub>n</sub> clusters with n = 2-20, 38, 55, 85, 146 and 231.

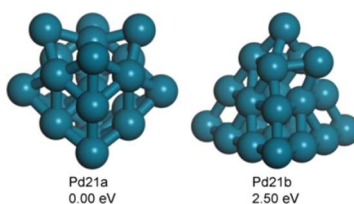

Figure S1b. Determined configurations of most stable Pd<sub>21</sub> cluster and the supported Pd<sub>21</sub> cluster in gas phase. The supported Pd<sub>21</sub> cluster is unstable in gas phase, and the ceria support can change the stability and morphology of clusters due to the interplay between cluster and ceria support.

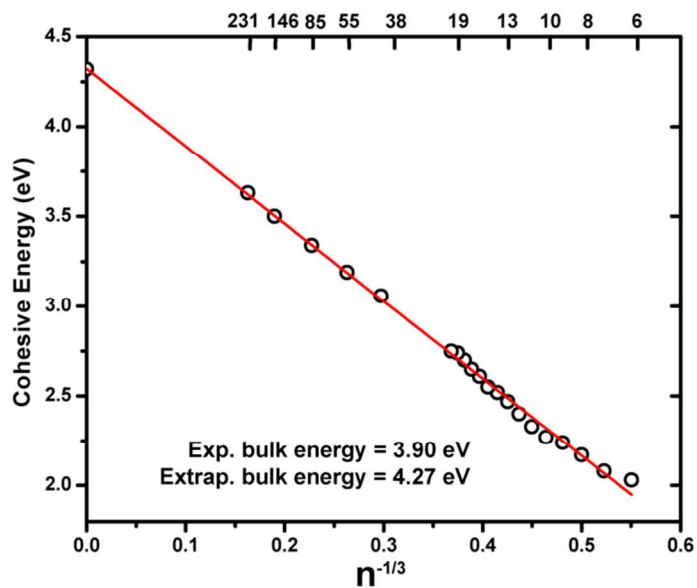

Figure S2. Cohesive energy of Pd<sub>n</sub> clusters, with n = 2-20, 38, 55, 85, 146 and 231 as a function of n<sup>-1/3</sup>.

## 2. Isomers of each Pd<sub>n</sub> clusters (n = 1-21, 41) on CeO<sub>2</sub>(111) surface

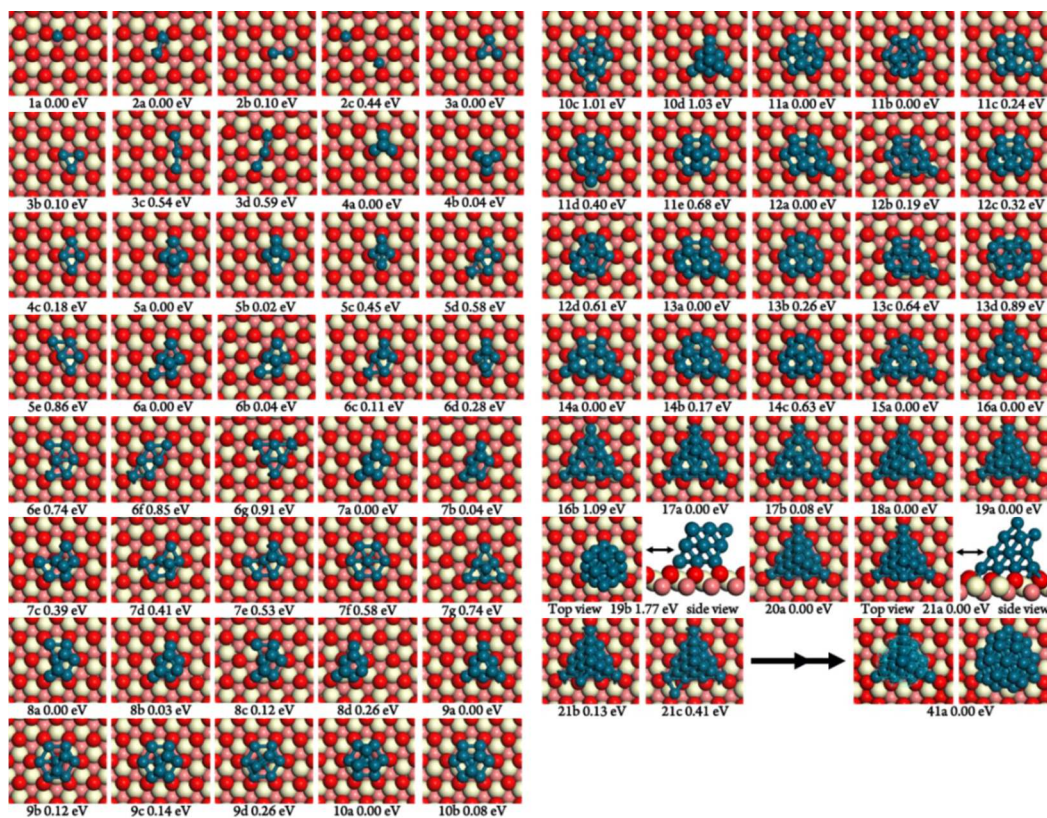

Figure S3a. Various isomers and relative energies of Pd<sub>n</sub> clusters on CeO<sub>2</sub>(111) surface. Color code: dark-cyan, Pd; red, surface O; light-coral, subsurface O; light-yellow: Ce.

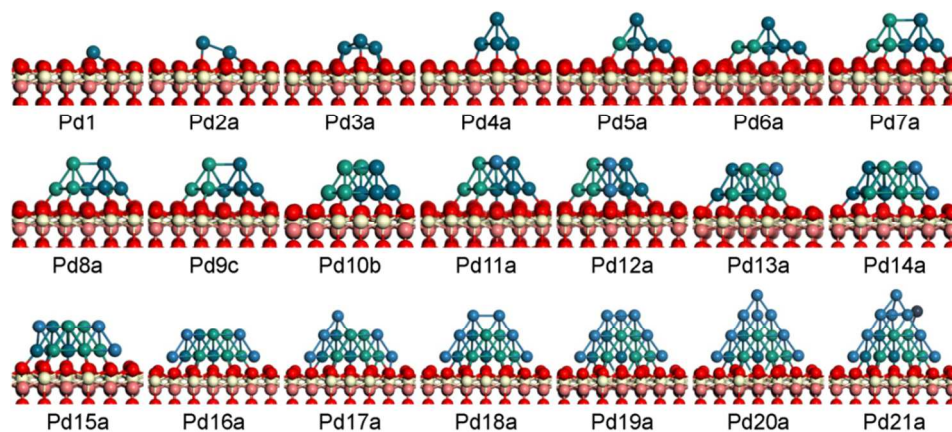

Figure S3b. The side-views of Stable  $\text{Pd}_n$  clusters ( $n = 1-21$ ) on the  $\text{CeO}_2(111)$  surface (Color code: red, surface O; light-yellow, Ce; coral, subsurface O; dark-cyan, 1<sup>st</sup> – 4<sup>th</sup> Pd; green, 5<sup>th</sup> – 10<sup>th</sup> Pd; blue, 11<sup>th</sup> – 20<sup>th</sup> Pd; black, 21<sup>st</sup> Pd). These structures correspond to ones in Figure 1, respectively.

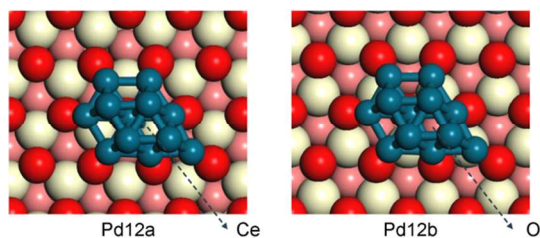

Figure S3c. Enlarged view on the structures of Pd<sub>12a</sub> and Pd<sub>12b</sub>. For 12a, the top three atoms correspond to the lattice O atoms in subsurface and the hollow site corresponds to Ce atom; while for 12b, the top three atoms correspond to the surface Ce atoms and the hollow site corresponds to subsurface O atom.

### 3. Diffusion of single Pd atoms on $\text{CeO}_2(111)$ surface

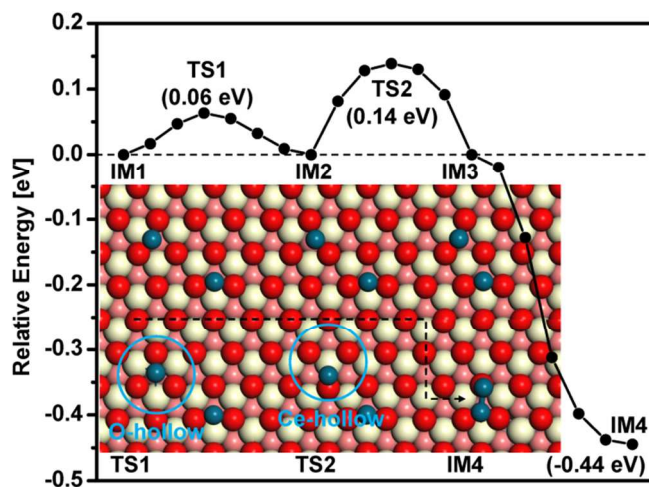

Figure S4. Diffusion Pathway of single Pd atoms on  $\text{CeO}_2(111)$  surface.

#### 4. Diffusion of Pd<sub>n</sub> clusters (n = 2, 3, 7 and 10) on CeO<sub>2</sub>(111) surface

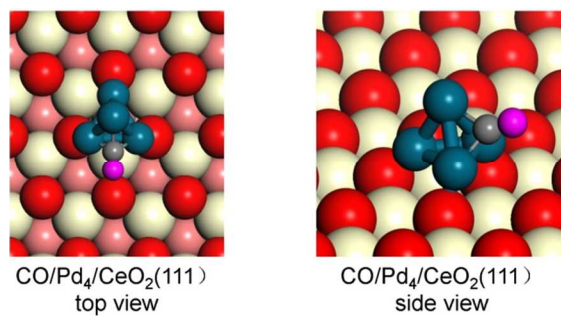

Figure S5. CO adsorption on the hollow site of supported Pd<sub>4</sub> cluster.

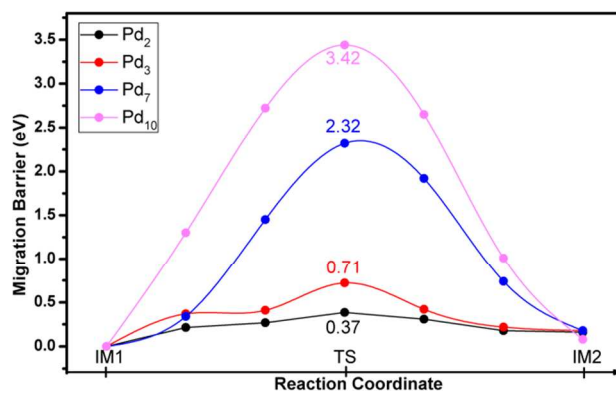

Figure S6. Potential energy profiles of Pd<sub>n</sub> clusters (n=2, 3, 7, 10) migration on CeO<sub>2</sub>(111) surface via two-step mechanism involving cluster rotation.

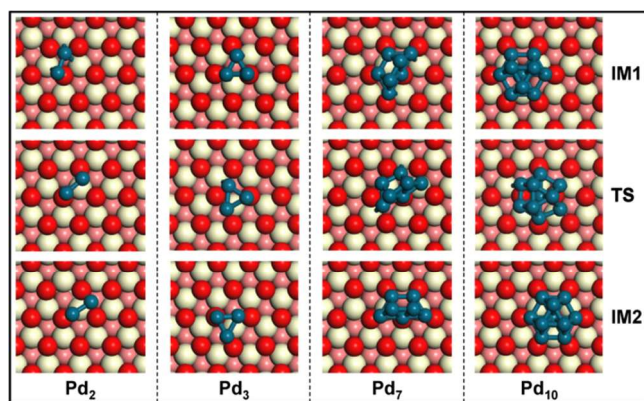

Figure S7. Relevant configurations of Pd<sub>n</sub> clusters (n=2, 3, 7, 10) diffusion involving rotation on CeO<sub>2</sub>(111) surface.

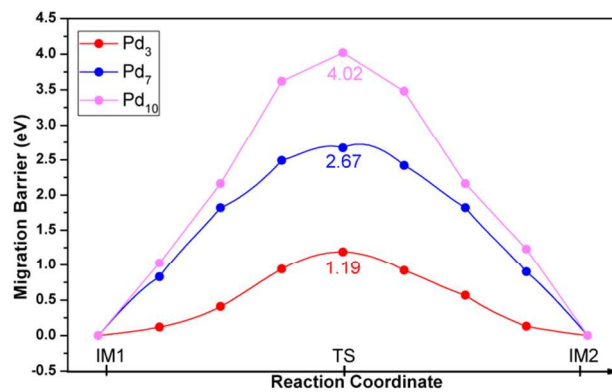

Figure S8. Potential energy profiles of  $\text{Pd}_n$  clusters ( $n=3, 7, 10$ ) migration on  $\text{CeO}_2(111)$  surface via direct mechanism.

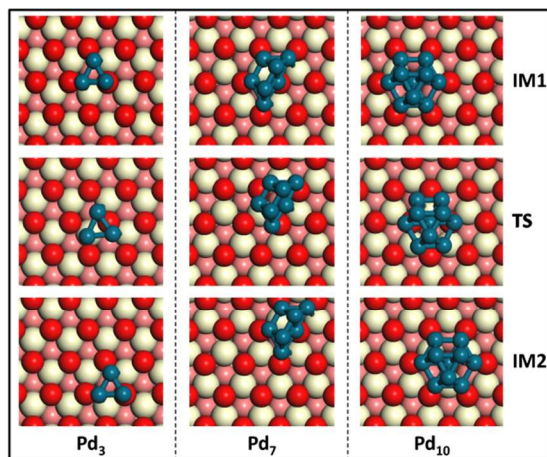

Figure S9. Relevant configurations of  $\text{Pd}_n$  clusters ( $n=3, 7, 10$ ) diffusion directly on  $\text{CeO}_2(111)$  surface.

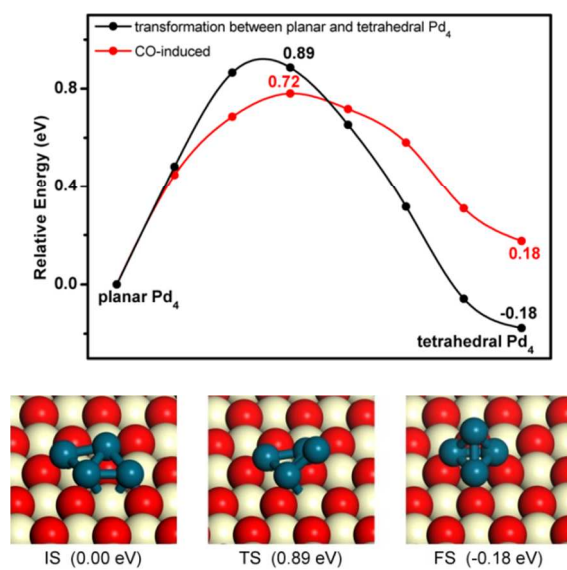

Figure S10. Transformation between planar and tetrahedral  $\text{Pd}_4$  clusters (IS, TS and FS are initial, transition and final state).

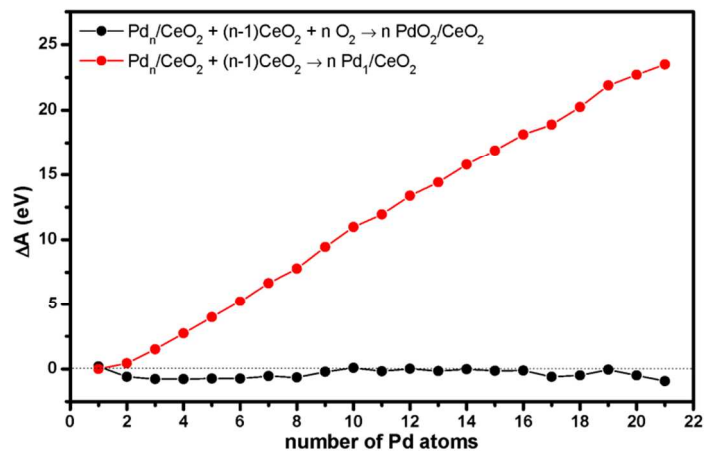

Figure S11. Thermodynamic analysis of ( $\text{O}_2$ -assisted) dispersion of  $\text{Pd}_n$  clusters ( $n = 2-21$ ) on  $\text{CeO}_2(111)$  into Pd and  $\text{PdO}_2$ . The Shown are the Helmholtz free energies at 600 K.

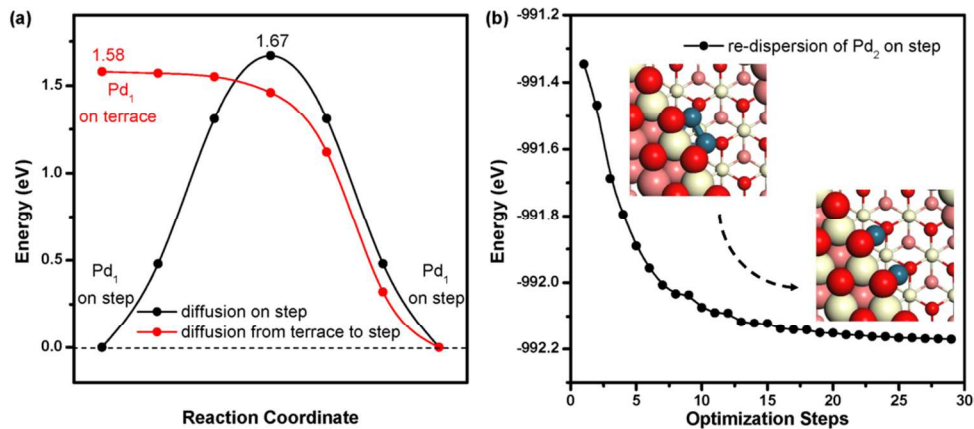

Figure S12. (a) Diffusion of single Pd atom on step (black line) and from terrace to step (red line) of  $\text{CeO}_2(111)$ . (b) Optimization of  $\text{Pd}_2$  cluster on step of  $\text{CeO}_2(111)$ . (Color code: red, surface O of terrace; light-yellow, Ce; coral, subsurface O of terrace; dark-cyan, Pd).
